# Supplementary material for: Screening, Optimization, and Bioavailability Research of Natural Deep Eutectic Solvent Extracts from Radix Pueraria
Source: PubMed Central journal article supplement (PMC7866862; doi:10.3390/molecules26030729), 2021-01-31

# Screening, Optimization and Bioavailability of Natural Deep Eutectic Solvent Extracts from *Radix Pueraria*

Yan Huang<sup>#,1</sup>, Jiehong Yang<sup>#,1</sup>, Yu Zhao<sup>1</sup>, Li Yu<sup>1</sup>, Yu He<sup>1</sup>, Haitong Wan<sup>\*1</sup>, Chang Li<sup>\*1</sup>

<sup>1</sup> Zhejiang Chinese Medical University, Hangzhou, 310057, PR China

# These authors contributed equally to this work.

\* Corresponding Authors

\* Chang Li, [lichang@zju.edu.cn](mailto:lichang@zju.edu.cn); Tel./Fax: +86 571 86613716

\* Haitong Wan, [whtong@126.com](mailto:whtong@126.com); Tel./Fax: +86 571 86613716

## *Supporting Information*

| <b>Table of contents</b>                                                                             | <b>Page</b> |
|------------------------------------------------------------------------------------------------------|-------------|
| Table S1. Different ratios of composition of NaDESs                                                  | 3           |
| Table S2. Extraction yields of PUE, 3-MPR and PRX from RP using NaDESs and traditional solvents      | 4           |
| Table S3. Extraction yields of PUE, 3-MPR and PRX from RP using L-Pro-Maa under different conditions | 5           |
| Table S4. Calibration curves and linear ranges for analytes by HPLC                                  | 6           |
| Figure S1. HPLC chromatogram of water extract of RP                                                  | 7           |
| Figure S2. HPLC chromatogram of L-Pro-Maa extract of RP                                              | 7           |
| Figure S3. HPLC chromatogram of methanol extract of RP                                               | 8           |

Table S1. Different ratios of composition of NaDESs

| No. | NaDES     | Type of HBA      | Type of HBD     | HBA/HBD ratio(water) |
|-----|-----------|------------------|-----------------|----------------------|
| 1   | ChCl-Ur   | Choline Chloride | Urea            | 1:2                  |
| 2   | ChCl-Am   |                  | Acetamide       | 1:1:(1)              |
| 3   | ChCl-Glu  |                  | D-Glucose       | 1:1:(2)              |
| 4   | ChCl-Ma   |                  | Maltose         | 2:1:(4)              |
| 5   | ChCl-Xyl  |                  | Xylitol         | 5:2:(5)              |
| 6   | ChCl-Gly  |                  | Glycerol        | 1:2                  |
| 7   | ChCl-Lac  |                  | Lactic Acid     | 1:1                  |
| 8   | ChCl-Maa  |                  | DL-Malic Acid   | 1:1                  |
| 9   | Bet-Ur    | Betaine          | Urea            | 1:1:(2)              |
| 10  | Bet-Ma    |                  | Maltose         | 5:2:(6)              |
| 11  | Bet-Suc   |                  | Sucrose         | 2:1:(7)              |
| 12  | Bet-Xyl   |                  | Xylitol         | 1:1:(1)              |
| 13  | Bet-Gly   |                  | Glycerol        | 1:1                  |
| 14  | Bet-Lac   |                  | Lactic Acid     | 1:1:(1)              |
| 15  | Bet-Maa   |                  | DL-Malic Acid   | 1:1:(1)              |
| 16  | L-Pro-Ur  | L-proline        | Urea            | 1:1:(3)              |
| 17  | L-Pro-Am  |                  | Acetamide       | 1:1:(2)              |
| 18  | L-Pro-Glu |                  | D-Glucose       | 1:1:(5)              |
| 19  | L-Pro-Suc |                  | Sucrose         | 2:1:(10)             |
| 20  | L-Pro-Sor |                  | D-Sorbitol      | 1:2:(4)              |
| 21  | L-Pro-Gly |                  | Glycerol        | 2:5                  |
| 22  | L-Pro-Ca  |                  | Citric Acid     | 1:1:(2)              |
| 23  | L-Pro-Lac |                  | Lactic Acid     | 1:3                  |
| 24  | L-Pro-Maa |                  | DL-Malic Acid   | 1:1:(1)              |
| 25  | L-Pro-Laa |                  | L-Ascorbic Acid | 1:1                  |

Table S2. Extraction yields of PUE, 3-MPR and PRX from RP using NaDESs and traditional solvents (values are expressed as mean  $\pm$  SD)

| <b>Entry</b> | <b>Solvent</b> | <b>PUE (mg/g)</b> | <b>3-MPR (mg/g)</b> | <b>PRX (mg/g)</b> |
|--------------|----------------|-------------------|---------------------|-------------------|
| <b>1</b>     | water          | 44.9 $\pm$ 1.7    | 5.7 $\pm$ 0.3       | 2.9 $\pm$ 0.5     |
| <b>2</b>     | methanol       | 45.5 $\pm$ 3.9    | 5.8 $\pm$ 0.7       | 3.8 $\pm$ 0.7     |
| <b>3</b>     | ChCl-Ur        | 51.0 $\pm$ 2.8    | 7.4 $\pm$ 0.2       | 4.4 $\pm$ 0.6     |
| <b>4</b>     | ChCl-Am        | 53.9 $\pm$ 2.9    | 6.8 $\pm$ 0.4       | 4.3 $\pm$ 0.6     |
| <b>5</b>     | ChCl-Glu       | 57.4 $\pm$ 0.7    | 6.6 $\pm$ 0.2       | 4.0 $\pm$ 0.6     |
| <b>6</b>     | ChCl-Ma        | 53.1 $\pm$ 1.5    | 7.2 $\pm$ 1.3       | 4.5 $\pm$ 1.1     |
| <b>7</b>     | ChCl-Xyl       | 52.3 $\pm$ 5.0    | 6.4 $\pm$ 1.3       | 4.0 $\pm$ 1.0     |
| <b>8</b>     | ChCl-Gly       | 54.6 $\pm$ 8.9    | 6.0 $\pm$ 1.4       | 5.2 $\pm$ 0.8     |
| <b>9</b>     | ChCl-Lac       | 51.4 $\pm$ 6.8    | 6.6 $\pm$ 0.5       | 4.6 $\pm$ 0.5     |
| <b>10</b>    | ChCl-Maa       | 66.2 $\pm$ 0.4    | 6.4 $\pm$ 0.4       | 3.6 $\pm$ 0.2     |
| <b>11</b>    | Bet-Ur         | 50.4 $\pm$ 2.8    | 7.8 $\pm$ 0.3       | 5.0 $\pm$ 0.7     |
| <b>12</b>    | Bet-Ma         | 60.7 $\pm$ 1.0    | 7.2 $\pm$ 0.5       | 4.4 $\pm$ 0.7     |
| <b>13</b>    | Bet-Suc        | 55.9 $\pm$ 1.9    | 7.4 $\pm$ 0.6       | 4.5 $\pm$ 0.7     |
| <b>14</b>    | Bet-Xyl        | 55.7 $\pm$ 3.9    | 7.0 $\pm$ 0.3       | 4.5 $\pm$ 0.4     |
| <b>15</b>    | Bet-Gly        | 54.0 $\pm$ 2.3    | 7.6 $\pm$ 1.6       | 4.8 $\pm$ 1.4     |
| <b>16</b>    | Bet-Lac        | 52.9 $\pm$ 2.3    | 8.8 $\pm$ 1.1       | 5.0 $\pm$ 0.7     |
| <b>17</b>    | Bet-Maa        | 70.4 $\pm$ 1.6    | 6.6 $\pm$ 0.5       | 4.1 $\pm$ 0.7     |
| <b>18</b>    | L-Pro-Ur       | 53.1 $\pm$ 2.9    | 8.1 $\pm$ 1.0       | 4.9 $\pm$ 0.6     |
| <b>19</b>    | L-Pro-Am       | 59.1 $\pm$ 3.9    | 7.3 $\pm$ 1.0       | 4.2 $\pm$ 0.3     |
| <b>20</b>    | L-Pro-Glu      | 56.2 $\pm$ 1.0    | 6.7 $\pm$ 0.7       | 3.5 $\pm$ 0.3     |
| <b>21</b>    | L-Pro-Suc      | 56.9 $\pm$ 8.5    | 7.7 $\pm$ 0.3       | 4.4 $\pm$ 0.5     |
| <b>22</b>    | L-Pro-Sor      | 55.2 $\pm$ 1.0    | 8.3 $\pm$ 1.6       | 5.3 $\pm$ 0.4     |
| <b>23</b>    | L-Pro-Gly      | 62.4 $\pm$ 2.1    | 8.3 $\pm$ 1.3       | 5.1 $\pm$ 0.4     |
| <b>24</b>    | L-Pro-Ca       | 67.7 $\pm$ 3.1    | 9.7 $\pm$ 0.8       | 5.5 $\pm$ 0.5     |
| <b>25</b>    | L-Pro-Lac      | 59.5 $\pm$ 3.0    | 6.9 $\pm$ 0.6       | 4.5 $\pm$ 0.9     |
| <b>26</b>    | L-Pro-Maa      | 74.0 $\pm$ 2.8    | 6.9 $\pm$ 0.4       | 4.0 $\pm$ 0.1     |
| <b>27</b>    | L-Pro-Laa      | 54.0 $\pm$ 2.5    | 6.8 $\pm$ 0.4       | 3.8 $\pm$ 0.1     |

Table S3. Extraction yields of PUE, 3-MPR and PRX from RP using L-Pro-Maa under different conditions ( values are expressed as mean±SD)

| <b>Extraction Condition</b>      | <b>PUE (mg/g)</b> | <b>3-MPR (mg/g)</b> | <b>PRX (mg/g)</b> |      |
|----------------------------------|-------------------|---------------------|-------------------|------|
| A. S/L Ratio<br>(mg/mL)          | 25                | 77.1                | 10.4              | 7.1  |
|                                  | 50                | 47.0                | 6.6               | 4.5  |
|                                  | 100               | 32.4                | 5.0               | 3.6  |
|                                  | 150               | 26.1                | 5.2               | 3.8  |
|                                  | 200               | 21.5                | 5.3               | 3.7  |
| B. DES Content<br>(%)            | 15                | 76.4                | 10.8              | 7.0  |
|                                  | 30                | 82.7                | 10.5              | 7.2  |
|                                  | 60                | 86.3                | 14.2              | 9.4  |
|                                  | 75                | 77.1                | 10.4              | 7.1  |
| C. Extraction Time<br>(min)      | 15                | 38.3                | 4.9               | 3.4  |
|                                  | 30                | 77.1                | 10.4              | 7.1  |
|                                  | 45                | 75.0                | 10.4              | 6.8  |
|                                  | 30                | 75.0                | 10.3              | 6.7  |
| D. Extraction<br>Temperature(°C) | 40                | 93.5                | 16.7              | 11.2 |
|                                  | 50                | 77.1                | 10.4              | 7.1  |
|                                  | 60                | 75.9                | 11.6              | 8.4  |
|                                  | 70                | 58.6                | 7.9               | 5.4  |

Table S4. Calibration curves, linear ranges, LOD and LOQ for analytes by HPLC

| No.   | Wavelength (nm) | Calibration Curve  | R <sup>2</sup> | Linear Range (mg/L) | LOD (mg/L) | LOQ (mg/L) |
|-------|-----------------|--------------------|----------------|---------------------|------------|------------|
| PUE   |                 | y = 43724x + 94419 | 0.9992         | 100-1000            | 3.9        | 12.0       |
| 3-MPR | 254             | y=65.556x+139.88   | 0.9998         | 5-200               | 1.6        | 4.7        |
| PRX   |                 | y=75.047x+65.267   | 0.9991         | 1-100               | 0.3        | 1.0        |

\* A calibration curve was obtained by injecting standard solutions of PUE at different concentrations, 1000, 750, 500, 250 and 100 mg/L. The calibration curve as follow:  $y = 43,724x + 94,419$  ( $R^2=0.9992$ ).

\* A calibration curve was obtained by injecting standard solutions of 3-MPR at different concentrations, 200, 100, 50, 25 and 5 mg/L. The calibration curve as follow:  $y = 65.556x + 139.88$  ( $R^2=0.9998$ ).

\* A calibration curve was obtained by injecting standard solutions of PRX at different concentrations, respectively 100, 50, 25, 10 and 1 mg/L. The calibration curve as follow:  $y = 75.047x+65.267$  ( $R^2=0.9991$ ).

\* LOD and LOQ was determined following references:

Reference:

[1] Mannino G, Di Stefano V, Lauria A, et al. Vaccinium macrocarpon (cranberry)-based dietary supplements: Variation in mass uniformity, proanthocyanidin dosage and anthocyanin profile demonstrates quality control standard needed[J]. *Nutrients*, 2020, 12(4).

[2] Sarkar M, Khandavilli S, Panchagnula R. Development and validation of rp-hplc and ultraviolet spectrophotometric methods of analysis for the quantitative estimation of antiretroviral drugs in pharmaceutical dosage forms[J]. *J Chromatogr B Analyt Technol Biomed Life Sci*, 2006, 830(2): 349-354.

Figure S1. HPLC chromatogram of aqueous extract of RP (wavelength=254nm)

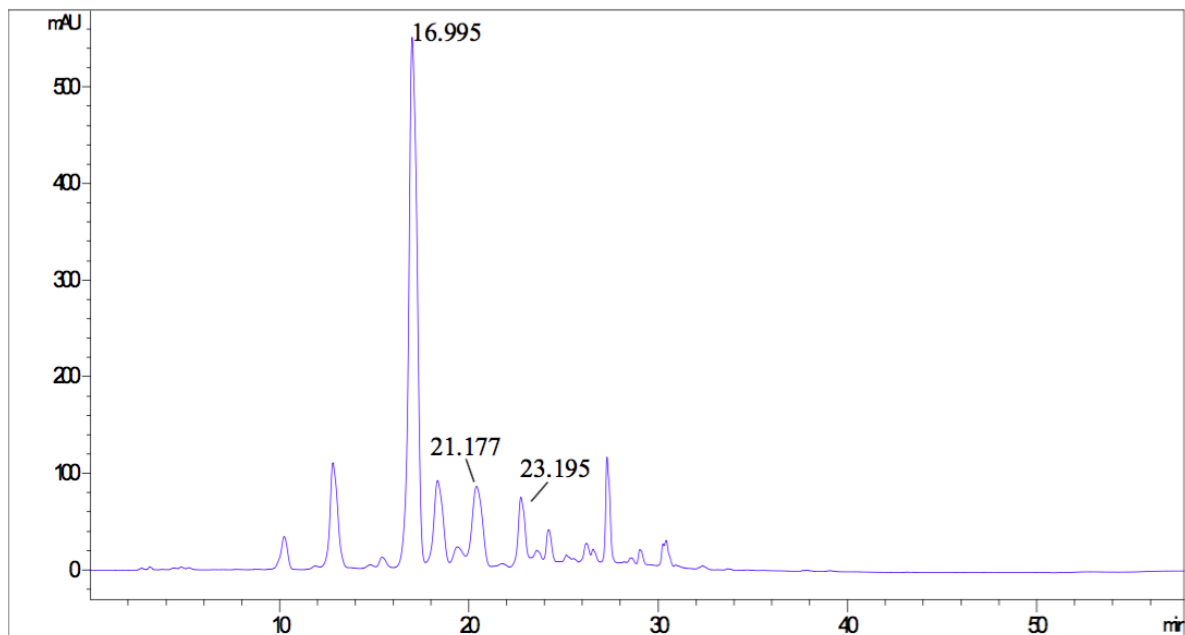

Figure S2. HPLC chromatogram of L-Pro-Maa extract of RP (wavelength=254nm)

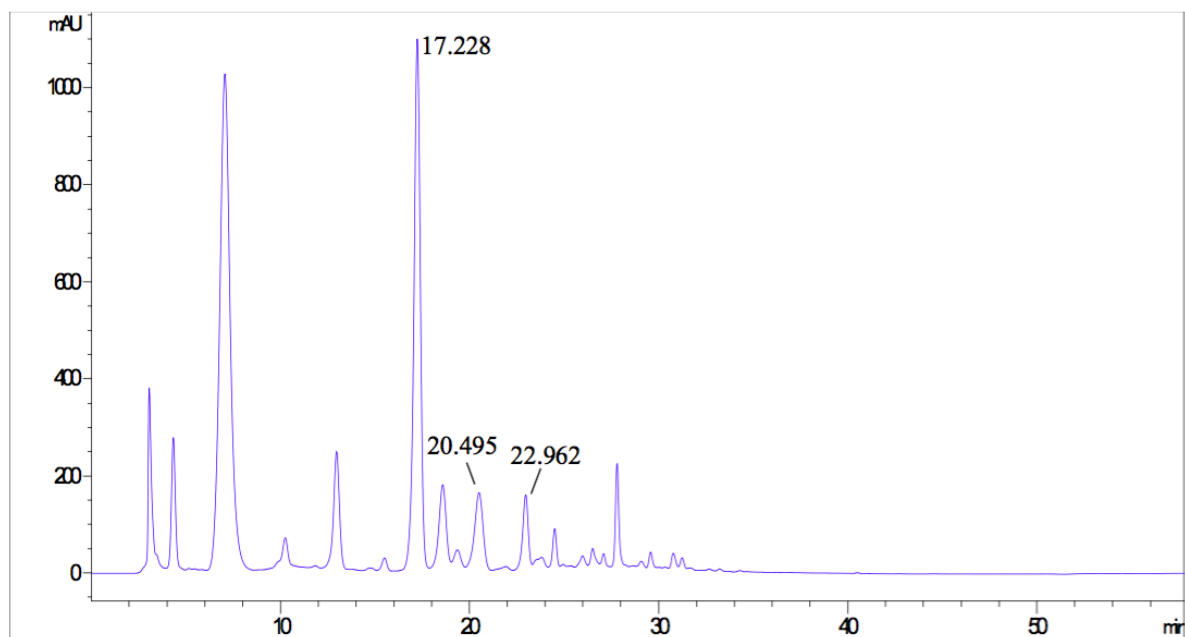

Figure S3. HPLC chromatogram of methanol extract of RP (wavelength=254nm)

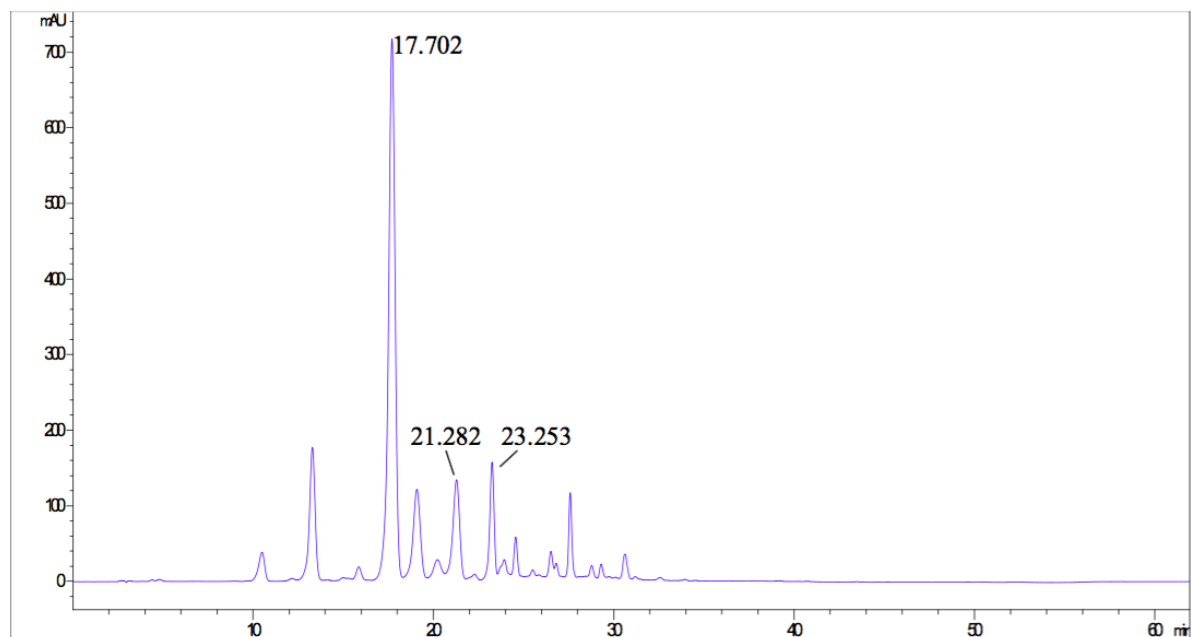

Supplement: molecules-26-00729-s001.pdf [file molecules-26-00729-s001.pdf]
